# Supplementary material for: Enhanced dielectric performance in flexible MWCNT/poly(vinylidene fluoride-co-hexafluoropropene)-based nanocomposites by designing a tri-layered structure
Source: Royal Society of Chemistry journal article supplement (doi:10.1039/d0tc00148a), 2020-01-01
Supplement: d0tc00148a1.pdf [file d0tc00148a1.pdf]

**Enhanced dielectric performance in flexible MWCNTs/poly(vinylidene fluoride-co-hexafluoropropene)-based nanocomposites by the design of tri-layered structure**

Jie Chen<sup>a</sup>, Yifei Wang<sup>b</sup>, Jiufeng Dong<sup>c</sup>, Yujuan Niu<sup>c,d</sup>, Weixing Chen<sup>a</sup>, and Hong

Wang<sup>c,\*</sup>

<sup>a</sup> School of Materials and Chemical Engineering, Xi'an Technological University, Xi'an 710021, China

<sup>b</sup> Electrical Insulation Research Center, Institute of Materials Science, University of Connecticut, Storrs, Connecticut 06269, USA

<sup>c</sup> Department of Materials Science and Engineering & Shenzhen Engineering Research Center for Novel Electronic Information Materials and Devices, Southern University of Science and Technology, Shenzhen 518055, China

<sup>d</sup> SUSTech Academy for Advanced Interdisciplinary Studies, Southern University of Science and Technology, Shenzhen 518055, China

\* **Corresponding authors.** E-mail address: [wangh6@sustech.edu.cn](mailto:wangh6@sustech.edu.cn) (H. Wang).

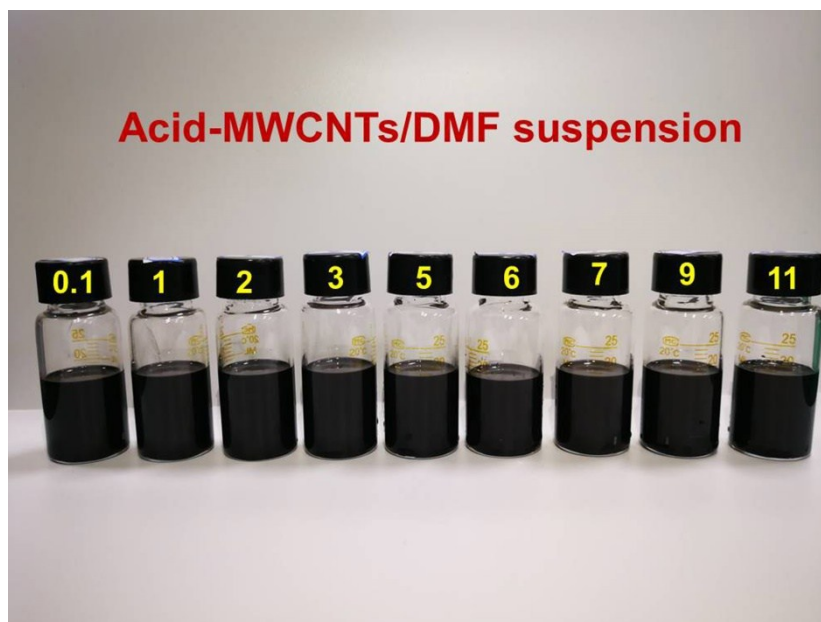

Figure S1. Photographs of solution stability of the suspension with acid-treated MWCNTs in DMF solution.

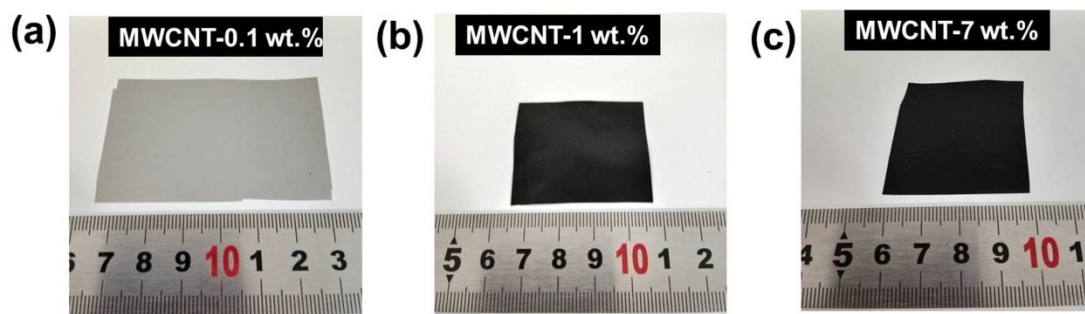

Figure S2. Photos of the single layer composite film with (a) 0.1 wt.% MWCNT (b) 1 wt.% MWCNT (c) 7 wt.% MWCNT.

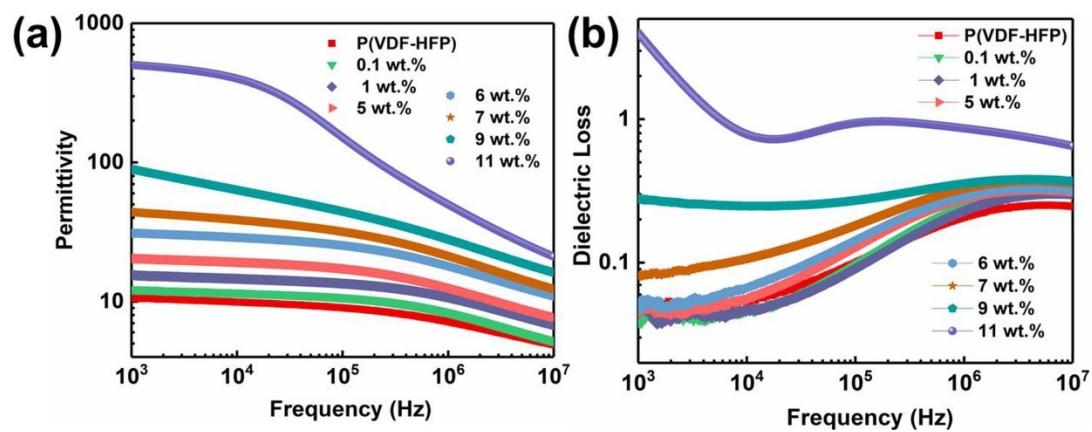

Figure S3. (a) Dependence of the permittivity and (b) dielectric loss of the acid-treated MWCNT/PVDF composites on the MWCNT mass fraction.

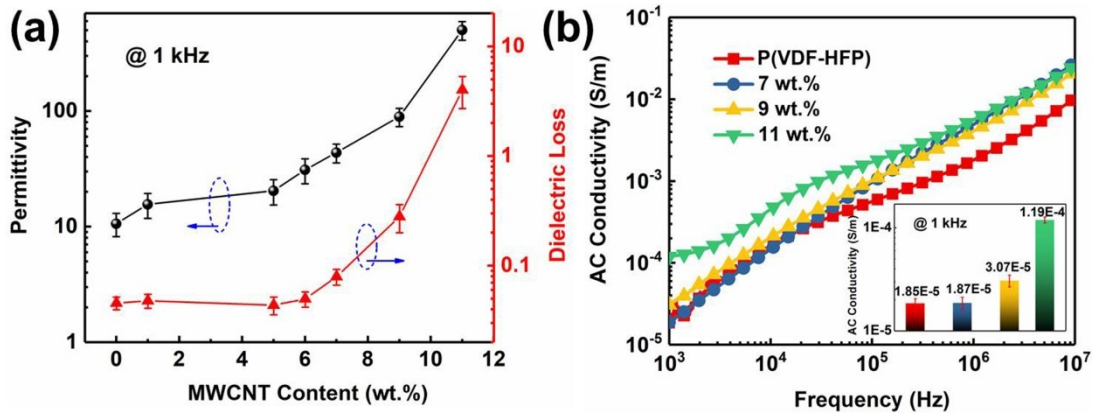

Figure S4. (a) Permittivity and dielectric loss of the MWCNT/P(VDF-HFP) composites at 1 kHz as function of MWCNT content. (b) Dependence of the AC conductivity of the MWCNT/PVDF composites on the MWCNT mass fraction. And the inset in (b) shows the AC conductivity measured at 1 kHz.
